# Supplementary material for: Antigen-Heterologous Vaccination Regimen Triggers Alternate Antibody Targeting in SARS-CoV-2-DNA-Vaccinated Mice
Source: MDPI journal article supplement (doi:10.3390/vaccines12030218), 2024-02-20
Supplement: s1 [file s1]

## Supplementary Material

# Antigen heterologous vaccination regimen triggers alternate antibody targeting in SARS-CoV-2 DNA vaccinated mice

Anders Frische, Karen Angeliki Krogfelt, Anders Fomsgaard, Ria Lassaunière\*

\* Correspondence: Corresponding Author: mlas@ssi.dk

## 1 Supplementary Figures

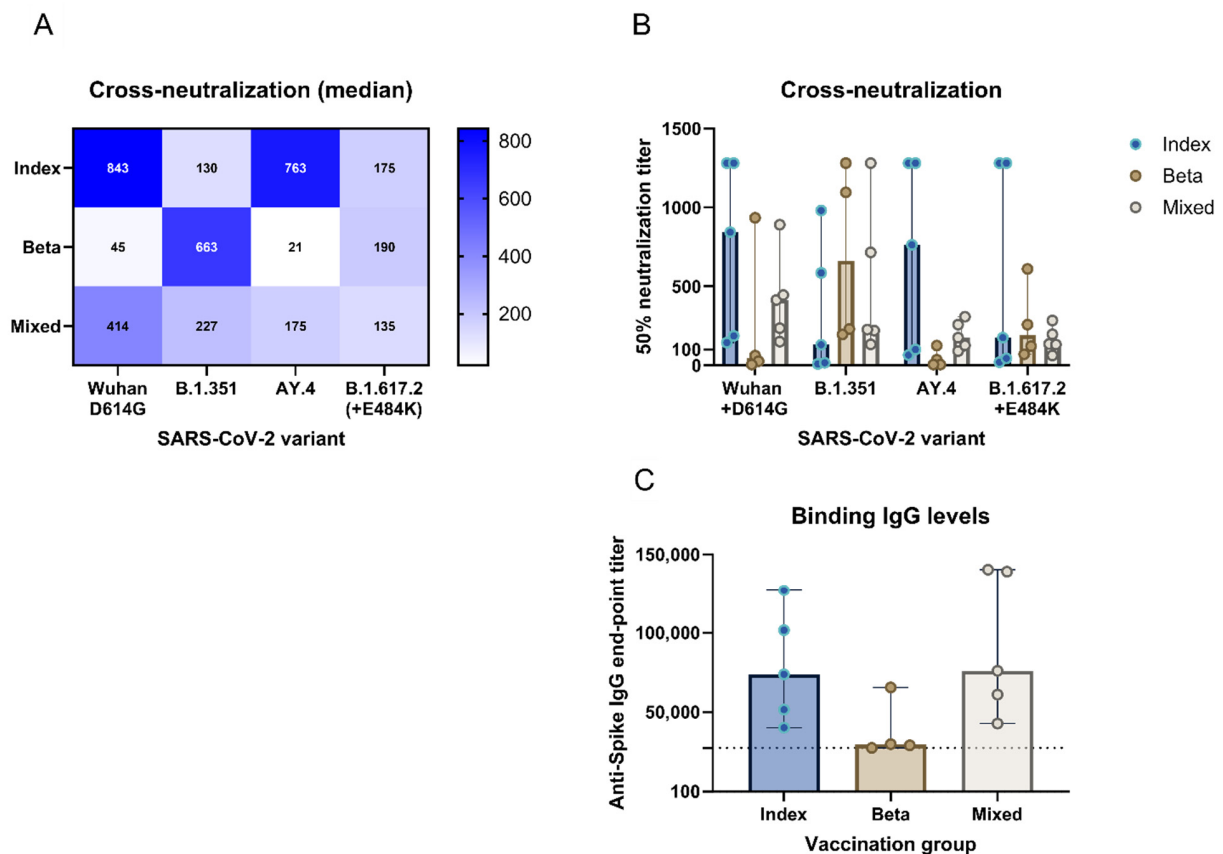

**Supplementary Figure S1.** Levels of cross-neutralization. Mice received three immunizations with 2-week intervals of a DNA vaccine encoding either the SARS-CoV-2 Index strain spike protein (Index), the SARS-CoV-2 Beta VOC spike protein (Beta) or a combination of the two (Mixed). Two weeks after final vaccination, 50% virus neutralization titers were determined for SARS-CoV-2 variants [1]. (A) Heatmap shows median levels of 50% virus neutralization titers. (B) Individual levels of cross-neutralization. Bars represent median levels. (C) Individual levels of anti D614G Spike IgG (end-point titer) arranged according to vaccination group. Bars represent median levels. Dotted line represents level of normalization.

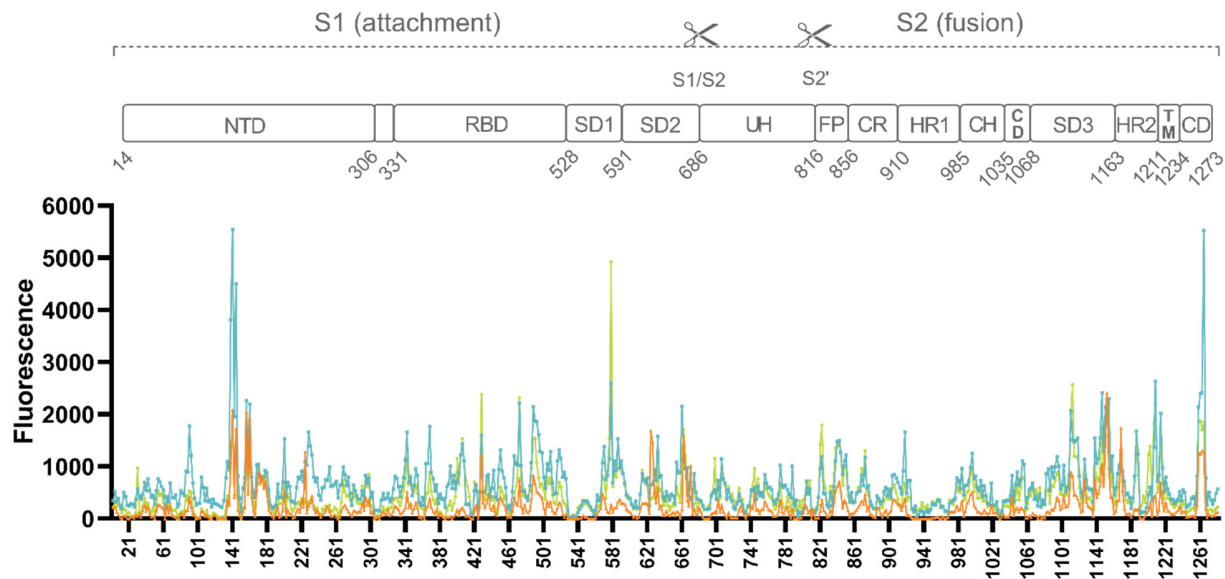

**Supplementary Figure S2.** Serum binding low affinity antibody profiles. Antibody binding to 10-mer overlapping peptides spanning the ectodomain of the SARS-CoV-2 index strain spike protein with a serum dilution of 1:100 in all three groups. Green: Index vaccinated group; Turquoise: Beta vaccinated group; Orange: mix vaccinated group. The x-axis represents the spike protein amino acid as in the last position of the individual peptides. Fluorescence levels on the y-axis indicate the average level of antibody binding to each peptide measured in duplicate and are normalized according to a positive control included on each subarray. S1 subunit (residues 14–685); S2 subunit (residues 686–1273); N-terminal domain (NTD); receptor binding domain (RBD); sub-domain 1, 2, 3 (SD1, SD2, SD3), S1/S2 furin cleavage site; upstream helix (UH); S2' cleavage site; fusion peptide (FP); connecting region (CR); heptad repeat sequence 1 and 2 (HR1, HR2); central helix (CH); connector domain (CD); transmembrane helix (TM); connector domain (CD).

## 2 References

1. Lassaunière R, Polacek C, Gram GJ, Frische A, Tingstedt JL, Krüger M, Dorner BG, Cook A, Brown R, Orekov T, et al. Preclinical evaluation of a candidate naked plasmid DNA vaccine against SARS-CoV-2. *npj Vaccines* (2021) 6:1–13. doi: 10.1038/s41541-021-00419-z
